# Supplementary material for: Automatic brain segmentation using fractional signal modeling of a multiple flip angle, spoiled gradient-recalled echo acquisition
Source: Springer Nature journal article supplement (doi:10.1007/s10334-014-0439-2), 2014-03-17
Supplement: MOESM1 [file 8789336]

**Online Resource 1** Performance measures and goodness of fit for the simulations. One standard deviation is in parenthesis, where applicable

| **SNR** | **Accuracy**  **CSF / GM / WM** | **Precision**  **CSF / GM / WM** | **Accuracy’**  **CSF / GM / WM** | **Precision’**  **CSF / GM / WM** | **Volume overlap**  **CSF / GM / WM** | **Volume agreement**  **CSF / GM / WM** | **nRMSE** |
| --- | --- | --- | --- | --- | --- | --- | --- |
| **10** | 0.11 / -0.18 / 0.07 | 0.23 / 0.40 / 0.26 | -0.02 / -0.36 / -0.07 | 0.18 / 0.52 / 0.23 | 0.91 (0.14) / 0.58 (0.40) / 0.88 (0.15) | 0.76 / 0.77 / 0.90 | 9.83 (4.35) |
| **25** | 0.07 / -0.10 / 0.04 | 0.15 / 0.26 / 0.14 | 0.01 / -0.19 / -0.02 | 0.08 / 0.34 / 0.12 | 0.96 (0.06) / 0.79 (0.28) / 0.94 (0.07) | 0.84 / 0.88 / 0.95 | 3.92 (1.78) |
| **50** | 0.03 / -0.04 / 0.01 | 0.08 / 0.15 / 0.08 | 0.01 / -0.08 / -0.01 | 0.05 / 0.18 / 0.07 | 0.98 (0.05) / 0.91 (0.12) / 0.97 (0.05) | 0.92 / 0.95 / 0.98 | 2.01 (0.94) |
| **100** | 0.01 / -0.01 / 0.00 | 0.04 / 0.08 / 0.04 | 0.01 / -0.02 / -0.01 | 0.04 / 0.09 / 0.04 | 0.98 (0.04) / 0.96 (0.05) / 0.98 (0.04) | 0.97 / 0.99 / 1.00 | 1.09 (0.57) |
| **150** | 0.01 / 0.00 / -0.01 | 0.03 / 0.06 / 0.04 | 0.01 / 0.00 / -0.01 | 0.03 / 0.07 / 0.04 | 0.98 (0.04) / 0.97 (0.03) / 0.98 (0.04) | 0.98 / 1.00 / 0.99 | 0.80 (0.49) |
| **200** | 0.00 / 0.00 / -0.01 | 0.03 / 0.06 / 0.03 | 0.01 / 0.00 / -0.01 | 0.03 / 0.06 / 0.03 | 0.99 (0.04) / 0.98 (0.03) / 0.99 (0.04) | 0.99 / 1.00 / 0.99 | 0.67 (0.47) |
